# Supplementary material for: A Novel Three-Point Localization Method for Bladder Volume Estimation
Source: MDPI journal article supplement (doi:10.3390/s24061932), 2024-03-18
Supplement: s1 [file s1]

# A novel three-point localization method for bladder volume estimation

Junru Yuan, Mingke Shen, Tao Zhang, Jun Ou-Yang, Xiaofei Yang, Benpeng Zhu\*

School of Integrated Circuits, Huazhong University of Science and Technology,  
Wuhan 430074, China.

\*Author to whom correspondence should be addressed.

E-mail: benpengzhu@hust.edu.cn

## Supplementary Materials

**Transducer Material Parameters Table S1**

| Material               | Function                  | Density (kg/m <sup>3</sup> ) | Velocity(m/s) | Thickesses(μm) |
|------------------------|---------------------------|------------------------------|---------------|----------------|
| Epoxy                  | The second matching layer | 1150                         | 2650          | 190            |
| Epoxy+ZrO <sub>2</sub> | The first matching layer  | 2430                         | 3200          | 240            |
| PZT                    | The piezoelectric layer   | 7500                         | 4400          | 540            |
| E-solder 3022          | The backing layer         | 3200                         | 1850          | 5000           |

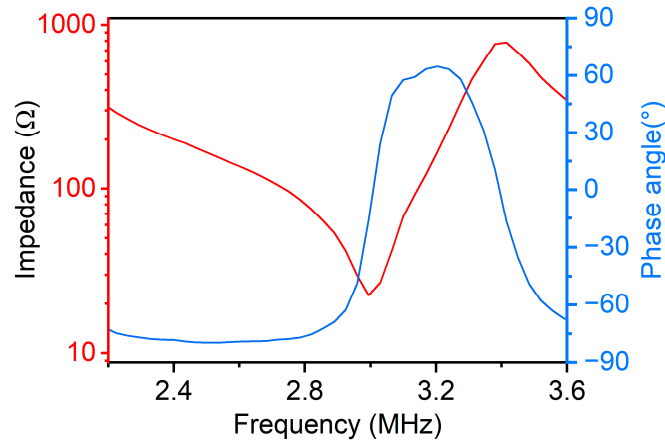

**Figure S1.** The electrical impedance test of transducer.

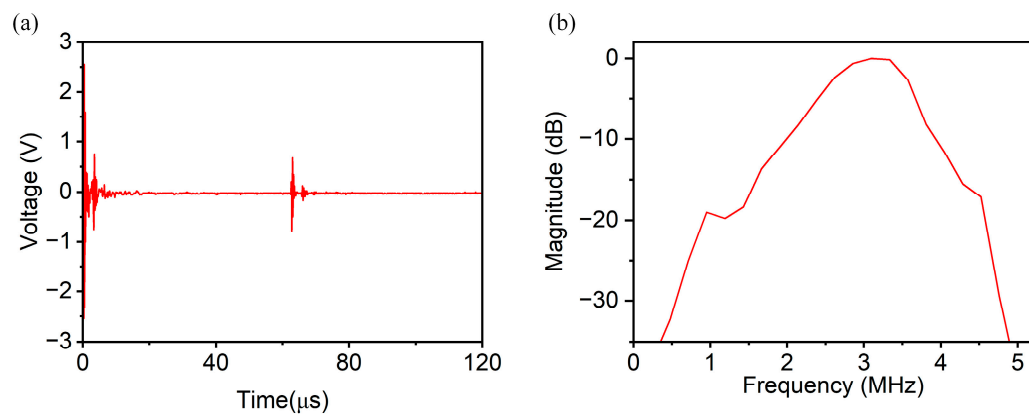

**Figure S2.** (a) The echo signal of the transducer. (b) The frequency gain diagram of the echo signal.
